# Supplementary material for: Health outcomes in offspring born to survivors of childhood cancers following assisted reproductive technologies
Source: Springer Nature journal article supplement (doi:10.1007/s11764-020-00929-0), 2020-08-25
Supplement: MOESM1 [file 18313454]

**Health outcomes in offspring born to survivors of childhood cancers following assisted  
reproductive technologies**

Greta Sommerhäuser; Anja Borgmann-Staudt; Kathy Astrahantseff; Katja Baust; Gabriele Calaminus; Ralf  
Dittrich; Marta J. Fernández-González; Heike Hölling; Charlotte J. König; Ralph Schilling; Theresa  
Schuster; Laura Lotz; Magdalena Balcerek

**Corresponding author** Prof. Dr. med. Anja Borgmann-Staudt

Charité-Universitätsmedizin Berlin

Department of Pediatric Oncology and Hematology

Augustenburger Platz 1, 13353 Berlin

Telephone: +49 30 450 666 204 / Email: [anja.borgmann@charite.de](mailto:anja.borgmann@charite.de)

**Supplemental Figure 1.** CONSORT diagram on cohort enrolment, response behavior and exclusion criteria.

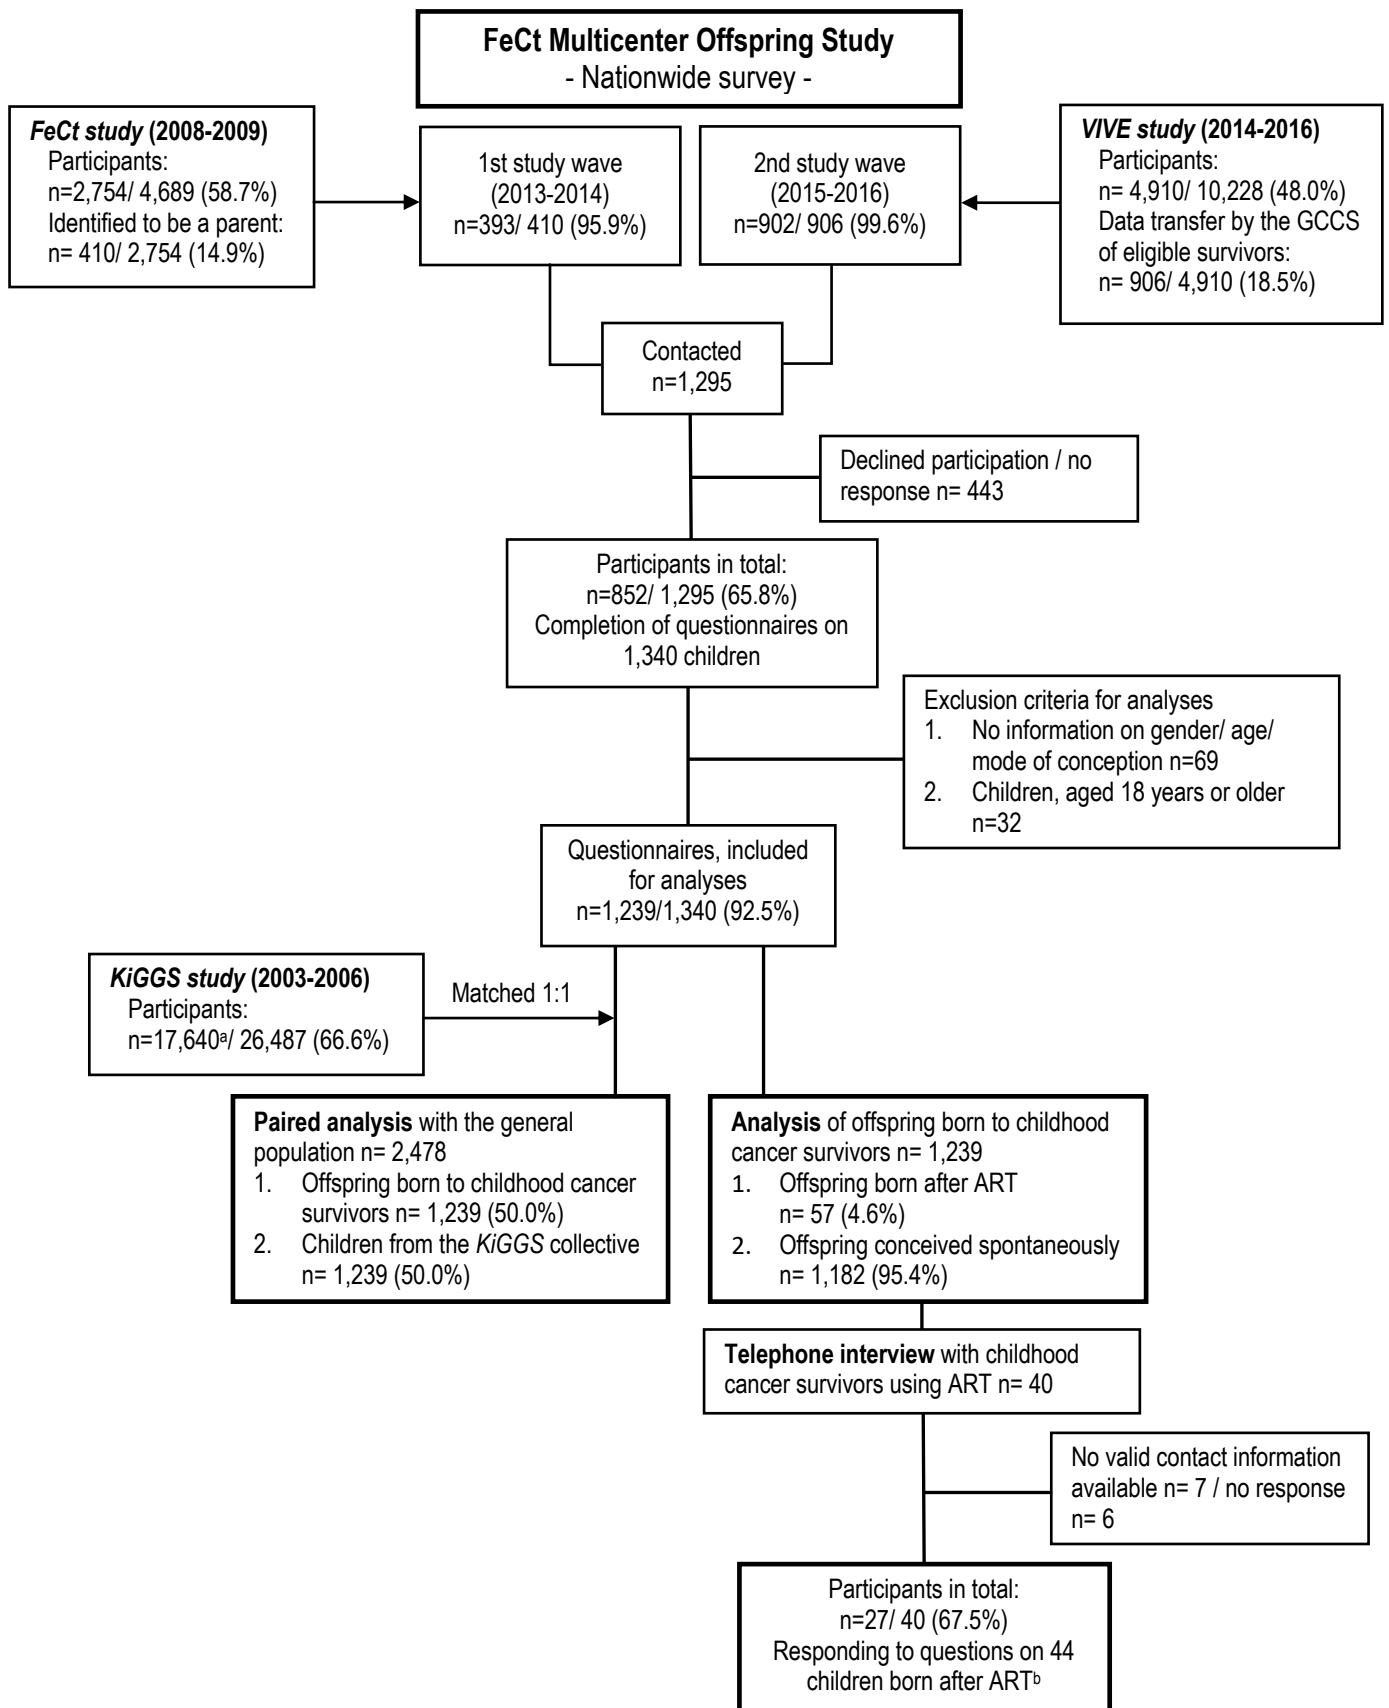

<sup>a</sup>retrospectively, data deletion was requested by one *KiGGS* participant

<sup>b</sup>including five children born after study participation

**Acronyms & Abbreviations:**

FeCt, Fertility after chemo- and radiation therapy in childhood and adolescence

GCCS, German Childhood Cancer Registry

ART, Assisted reproductive technology

**Supplemental Table 1.** Responder analysis of the contacted German childhood cancer survivors (n=1,295)

| Characteristic                      | Responder        |             | Non-Responder    |             | P     |
|-------------------------------------|------------------|-------------|------------------|-------------|-------|
|                                     | Missing Data (n) | n (%)       | Missing Data (n) | n (%)       |       |
| <b>Total</b>                        |                  | 852 (100.0) |                  | 443 (100.0) |       |
| <b>Gender</b>                       | -                |             | -                |             | <.001 |
| Female                              |                  | 582 (68.3)  |                  | 247 (55.8)  |       |
| Male                                |                  | 270 (31.7)  |                  | 196 (44.2)  |       |
| <b>Age at time of survey</b>        | -                |             | -                |             | .171  |
| Mean age [SD]                       |                  | 33.4 [4.9]  |                  | 33.8 [5.5]  |       |
| Median age [IQR]                    |                  | 33 [7.0]    |                  | 33 [6.0]    |       |
| 18 to 24                            |                  | 18 (2.1)    |                  | 20 (4.5)    |       |
| 25 to 29                            |                  | 176 (20.7)  |                  | 74 (16.7)   |       |
| 30 to 34                            |                  | 325 (38.1)  |                  | 151 (34.1)  |       |
| ≥ 35                                |                  | 333 (39.1)  |                  | 198 (44.7)  |       |
| <b>Age at time of diagnosis</b>     | -                |             | -                |             | .253  |
| Mean age [SD]                       |                  | 8.4 [4.3]   |                  | 8,7 [4.2]   |       |
| Median age [IQR]                    |                  | 9 [7.0]     |                  | 10 [7.0]    |       |
| 0 to 4                              |                  | 210 (24.6)  |                  | 102 (23.0)  |       |
| 5 to 9                              |                  | 238 (27.9)  |                  | 111 (25.1)  |       |
| ≥ 10                                |                  | 404 (47.4)  |                  | 230 (51.9)  |       |
| <b>Diagnosis (ICCC-3)</b>           | -                |             | -                |             | .199  |
| Leukemia                            |                  | 361 (42.4)  |                  | 191 (43.1)  |       |
| Lymphomas                           |                  | 124 (14.6)  |                  | 83 (18.7)   |       |
| Brain tumors                        |                  | 63 (7.4)    |                  | 36 (8.1)    |       |
| Neuroblastoma                       |                  | 29 (3.4)    |                  | 9 (2.0)     |       |
| Retinoblastoma                      |                  | 17 (2.0)    |                  | 10 (2.3)    |       |
| Renal tumors                        |                  | 60 (7.0)    |                  | 29 (6.5)    |       |
| Hepatic tumors                      |                  | 3 (0.4)     |                  | 1 (0.2)     |       |
| Bone tumors                         |                  | 78 (9.2)    |                  | 33 (7.4)    |       |
| Soft tissue tumors                  |                  | 77 (9.0)    |                  | 27 (6.1)    |       |
| Germ cell tumors                    |                  | 32 (3.8)    |                  | 14 (3.2)    |       |
| Other malignant epithelial neoplasm |                  | 8 (0.9)     |                  | 9 (2.0)     |       |
| Other neoplasm, unspecified         |                  | -           |                  | 1 (0.2)     |       |
| <b>Educational level</b>            | 18               |             | 7                |             | <.001 |
| High                                |                  | 373 (44.7)  |                  | 134 (30.7)  |       |
| Medium                              |                  | 339 (40.7)  |                  | 164 (37.6)  |       |
| Low                                 |                  | 122 (14.6)  |                  | 138 (31.7)  |       |

SD, standard deviation; IQR, interquartile range; ICCC-3, International Classification of Childhood Cancer, third revision (<https://seer.cancer.gov/iccc/>)

**Supplemental Table 2. Multivariate analyses in offspring born to childhood cancer survivors<sup>a</sup>**

| Characteristic                                    | Preterm birth          |      | Low birth weight          |       | Small for gestational age |      | Congenital malformations |              | Congenital heart defects  |              |
|---------------------------------------------------|------------------------|------|---------------------------|-------|---------------------------|------|--------------------------|--------------|---------------------------|--------------|
|                                                   | OR (95% CI)            | P    | OR (95% CI)               | P     | OR (95% CI)               | P    | OR (95% CI)              | P            | OR (95% CI)               | P            |
| <b>ART</b>                                        | 1.121 (0.449 to 2.797) | .806 | 2.395 (0.795 to 7.217)    | .121  | 2.097 (0.859 to 5.116)    | .104 | 0.47 (0.059 to 3.736)    | .476         | 5.705 (0.155 to 209.576)  | .344         |
| <b>Female gender</b>                              | 1.261 (0.844 to 1.884) | .257 | 0.881 (0.494 to 1.570)    | .667  | 0.695 (0.436 to 1.109)    | .127 | 0.694 (0.376 to 1.282)   | .244         | 4.463 (1.180 to 16.878)   | .028         |
| <b>Age at time of survey</b>                      |                        |      |                           |       |                           |      |                          |              |                           |              |
| 0 to 6                                            | <i>Reference</i>       | -    | <i>Reference</i>          | -     | <i>Reference</i>          | -    | <i>Reference</i>         | -            | <i>Reference</i>          | -            |
| 7 to 13                                           | 1.527 (0.969 to 2.408) | .068 | 1.785 (0.944 to 3.377)    | .075  | 0.774 (0.435 to 1.375)    | .381 | 2.281 (1.206 to 4.312)   | .011         | 0.319 (0.081 to 1.260)    | .103         |
| ≥ 14                                              | 2.485 (1.222 to 5.051) | .012 | 1.794 (0.623 to 5.163)    | .279  | 2.179 (0.980 to 4.845)    | .056 | 1.414 (0.393 to 5.084)   | .596         | 0.039 (0.001 to 2.360)    | .121         |
| <b>Multiple-sibling birth</b>                     | 3.902 (1.804 to 8.441) | .001 | 1.604 (0.508 to 5.063)    | .420  | 1.894 (0.721 to 4.972)    | .195 | 1.836 (0.398 to 8.478)   | .436         | 0.596 (0.053 to 6.700)    | .675         |
| <b>Smoking during pregnancy</b>                   | 2.157 (1.139 to 4.085) | .018 | 0.490 (0.164 to 1.468)    | .203  | 1.519 (0.666 to 3.464)    | .320 | 0.598 (0.172 to 2.070)   | .417         | 1.952 (0.186 to 20.447)   | .577         |
| <b>Drinking during pregnancy</b>                  | 1.014 (0.366 to 2.810) | .978 | 1.203 (0.265 to 5.454)    | .811  | 0.890 (0.253 to 3.138)    | .857 | <sup>b</sup>             | <sup>b</sup> | <sup>b</sup>              | <sup>b</sup> |
| <b>Migration background</b>                       | 1.281 (0.800 to 2.051) | .302 | 1.538 (0.791 to 2.991)    | .204  | 1.567 (0.932 to 2.636)    | .091 | 0.862 (0.401 to 1.851)   | .703         | 0.463 (0.079 to 2.710)    | .393         |
| <b>Educational attainment</b>                     |                        |      |                           |       |                           |      |                          |              |                           |              |
| Low                                               | <i>Reference</i>       | -    | <i>Reference</i>          | -     | <i>Reference</i>          | -    |                          |              |                           |              |
| Medium                                            | 1.930 (0.953 to 3.910) | .068 | 1.894 (0.669 to 5.359)    | .229  | 0.887 (0.435 to 1.808)    | .741 |                          |              |                           |              |
| High                                              | 1.924 (0.926 to 3.999) | .080 | 1.506 (0.509 to 4.456)    | .459  | 1.069 (0.514 to 2.223)    | .858 |                          |              |                           |              |
| <b>Subjective health</b>                          |                        |      |                           |       |                           |      |                          |              |                           |              |
| Medium / poor / very poor                         | <i>Reference</i>       | -    | <i>Reference</i>          | -     | <i>Reference</i>          | -    | <i>Reference</i>         | -            | <i>Reference</i>          | -            |
| Good                                              | 0.581 (0.242 to 1.394) | .224 | 0.883 (0.238 to 3.271)    | .852  | 0.710 (0.244 to 2.068)    | .531 | 0.384 (0.132 to 1.121)   | .080         | 2.111 (0.291 to 15.325)   | .460         |
| Very good                                         | 0.540 (0.228 to 1.277) | .161 | 1.103 (0.302 to 4.033)    | .882  | 0.775 (0.274 to 2.194)    | .631 | 0.183 (0.062 to 0.537)   | .002         | 0.568 (0.082 to 3.950)    | .568         |
| <b>Preterm birth (&lt;37 weeks)</b>               |                        |      | 38.306 (21.044 to 69.727) | <.001 |                           |      |                          |              |                           |              |
| <b>Congenital malformations</b>                   | 2.985 (1.415 to 6.298) | .004 | 1.406 (0.431 to 4.581)    | .572  | 2.568 (1.062 to 6.210)    | .036 |                          |              | <sup>b</sup>              | <sup>b</sup> |
| <b>Congenital heart defects</b>                   | 1.142 (0.343 to 3.799) | .829 | 5.616 (1.030 to 30.610)   | .046  | 0.514 (0.093 to 2.832)    | .445 | <sup>b</sup>             | <sup>b</sup> |                           |              |
| <b>Age at time of diagnosis (survivor parent)</b> |                        |      |                           |       |                           |      |                          |              |                           |              |
| 0 to 4                                            | <i>Reference</i>       | -    | <i>Reference</i>          | -     | <i>Reference</i>          | -    | <i>Reference</i>         | -            | <i>Reference</i>          | -            |
| 5 to 9                                            | 0.787 (0.441 to 1.402) | .416 | 1.758 (0.741 to 4.170)    | .200  | 2.333 (1.184 to 4.597)    | .014 | 1.012 (0.456 to 2.247)   | .977         | 0.303 (0.061 to 1.500)    | .143         |
| ≥ 10                                              | 0.908 (0.548 to 1.504) | .707 | 1.808 (0.826 to 3.959)    | .138  | 1.346 (0.700 to 2.588)    | .373 | 0.595 (0.274 to 1.289)   | .188         | 0.362 (0.068 to 1.929)    | .234         |
| <b>Diagnosis (survivor parent, grouped)</b>       |                        |      |                           |       |                           |      |                          |              |                           |              |
| Leukemia / Lymphomas                              | <i>Reference</i>       | -    | <i>Reference</i>          | -     | <i>Reference</i>          | -    | <i>Reference</i>         | -            | <i>Reference</i>          | -            |
| Brain tumors                                      | 0.735 (0.296 to 1.825) | .507 | 2.393 (0.870 to 6.580)    | .091  | 2.256 (1.043 to 4.882)    | .039 | 0.623 (0.141 to 2.750)   | .533         | 14.634 (0.705 to 303.691) | .083         |
| Extracranial solid tumors                         | 1.240 (0.810 to 1.897) | .322 | 1.289 (0.697 to 2.386)    | .419  | 1.423 (0.862 to 2.350)    | .168 | 0.884 (0.455 to 1.717)   | .716         | 1.28 (0.342 to 4.793)     | .714         |

OR, odds ratio; CI, confidence interval; ART, assisted reproductive technologies

<sup>a</sup>Health outcome childhood cancers could not be taken into account for multivariate analyses as numbers were too small to report meaningful ORs.

<sup>b</sup>Numbers (n) were too small to report meaningful ORs

**Supplemental Table 3.** Multivariate analyses in offspring born to survivors and in the general population (*KiGGS study*)<sup>a</sup>

| Characteristic                     | Preterm birth           |       | Low birth weight          |       | Small for gestational age |      | Congenital malformations |      | Congenital heart defects |      |
|------------------------------------|-------------------------|-------|---------------------------|-------|---------------------------|------|--------------------------|------|--------------------------|------|
|                                    | OR (95% CI)             | P     | OR (95% CI)               | P     | OR (95% CI)               | P    | OR (95% CI)              | P    | OR (95% CI)              | P    |
| <b>Offspring born to survivors</b> | 2.002 (1.395 to 2.874)  | <.001 | 1.142 (0.704 to 1.854)    | .590  | 1.227 (0.848 to 1.777)    | .278 | 0.538 (0.364 to 0.796)   | .002 | 1.156 (0.584 to 2.288)   | .677 |
| <b>Female gender</b>               | 1.178 (0.85 to 1.632)   | .325  | 0.811 (0.519 to 1.266)    | .356  | 0.654 (0.461 to 0.927)    | .017 | 0.899 (0.623 to 1.298)   | .571 | 1.528 (0.784 to 2.977)   | .213 |
| <b>Age at time of survey</b>       |                         |       |                           |       |                           |      |                          |      |                          |      |
| 0 to 6                             | <i>Reference</i>        | -     | <i>Reference</i>          | -     | <i>Reference</i>          | -    | <i>Reference</i>         | -    | <i>Reference</i>         | -    |
| 7 to 13                            | 1.422 (0.976 to 2.073)  | .067  | 1.186 (0.710 to 1.982)    | .515  | 0.821 (0.539 to 1.251)    | .359 | 1.774 (1.206 to 2.609)   | .004 | 0.547 (0.258 to 1.159)   | .115 |
| ≥ 14                               | 2.341 (1.304 to 4.206)  | .004  | 1.053 (0.435 to 2.545)    | .909  | 1.421 (0.719 to 2.808)    | .312 | 0.489 (0.150 to 1.599)   | .237 | 4.146 (0.951 to 18.087)  | .058 |
| <b>Multiple-sibling birth</b>      | 6.965 (4.156 to 11.674) | <.001 | 4.178 (2.033 to 8.589)    | <.001 | 2.435 (1.267 to 4.680)    | .008 | 1.917 (0.845 to 4.351)   | .120 | 1.654 (0.504 to 5.436)   | .407 |
| <b>Smoking during pregnancy</b>    | 1.518 (0.923 to 2.498)  | .100  | 0.773 (0.367 to 1.631)    | .500  | 1.779 (1.098 to 2.882)    | .019 | 0.753 (0.420 to 1.353)   | .343 | 0.869 (0.288 to 2.623)   | .804 |
| <b>Drinking during pregnancy</b>   | 0.680 (0.338 to 1.367)  | .279  | 0.907 (0.364 to 2.261)    | .834  | 1.438 (0.811 to 2.547)    | .214 | 0.871 (0.462 to 1.644)   | .671 | 0.804 (0.250 to 2.592)   | .715 |
| <b>Migration background</b>        | 1.242 (0.844 to 1.829)  | .271  | 1.431 (0.851 to 2.408)    | .177  | 1.612 (1.093 to 2.377)    | .016 | 0.919 (0.588 to 1.435)   | .710 | 0.725 (0.308 to 1.705)   | .461 |
| <b>Educational attainment</b>      |                         |       |                           |       |                           |      |                          |      |                          |      |
| Low                                | <i>Reference</i>        | -     | <i>Reference</i>          | -     | <i>Reference</i>          | -    |                          |      |                          |      |
| Medium                             | 1.682 (0.959 to 2.948)  | .070  | 1.057 (0.508 to 2.202)    | .882  | 0.838 (0.506 to 1.388)    | .493 |                          |      |                          |      |
| High                               | 1.643 (0.913 to 2.958)  | .098  | 0.952 (0.437 to 2.073)    | .901  | 0.861 (0.501 to 1.478)    | .586 |                          |      |                          |      |
| <b>Subjective health</b>           |                         |       |                           |       |                           |      |                          |      |                          |      |
| Medium / poor / very poor          | <i>Reference</i>        | -     | <i>Reference</i>          | -     | <i>Reference</i>          | -    | <i>Reference</i>         | -    | <i>Reference</i>         | -    |
| Good                               | 0.347 (0.196 to 0.615)  | <.001 | 2.125 (0.786 to 5.746)    | .138  | 0.999 (0.457 to 2.183)    | .998 | 0.604 (0.323 to 1.127)   | .113 | 1.049 (0.354 to 3.105)   | .931 |
| Very good                          | 0.304 (0.171 to 0.540)  | <.001 | 2.229 (0.818 to 6.071)    | .117  | 1.062 (0.487 to 2.319)    | .879 | 0.312 (0.161 to 0.604)   | .001 | 1.088 (0.347 to 3.414)   | .885 |
| <b>Preterm birth</b>               |                         |       | 35.217 (22.249 to 55.741) | <.001 |                           |      |                          |      |                          |      |
| <b>Congenital malformations</b>    | 1.625 (0.888 to 2.975)  | .116  | 1.318 (0.550 to 3.160)    | .535  | 1.858 (1.000 to 3.450)    | .050 |                          |      | b                        | b    |
| <b>Congenital heart defects</b>    | 1.795 (0.726 to 4.436)  | .205  | 2.510 (0.712 to 8.849)    | .152  | 0.559 (0.171 to 1.832)    | .337 | b                        | b    |                          |      |

OR, odds ratio; CI, confidence interval

<sup>a</sup> Health outcome *childhood cancer* could not be taken into account for multivariate analyses as numbers were too small to report meaningful odds ratios

<sup>b</sup> Numbers were too small to report meaningful odds ratios
